# Supplementary material
Source: PubMed Central journal article supplement (PMC7089198)
Supplement: 11262_2017_1440_MOESM1_ESM.pdf [file 11262_2017_1440_MOESM1_ESM.pdf]

**Supplemental table 1.** Average coverage depth and mapped read count of the nearly full-length segment of the rotavirus I strain *Felis catus*

| <b>Structural protein</b>     | <b>Average coverage depth (bases)</b> | <b>Mapped read count</b> |
|-------------------------------|---------------------------------------|--------------------------|
| VP1                           | 157                                   | 2189                     |
| VP2                           | 243                                   | 5235                     |
| VP3                           | 284                                   | 5321                     |
| VP4                           | 320                                   | 5464                     |
| VP6                           | 45                                    | 408                      |
| VP7                           | 561                                   | 3219                     |
| <b>Non-structural protein</b> |                                       |                          |
| NSP1                          | 106                                   | 1006                     |
| NSP2                          | 364                                   | 2543                     |
| NSP3                          | 750                                   | 5897                     |
| NSP4                          | 211                                   | 5465                     |
| NSP5                          | 263                                   | 1124                     |

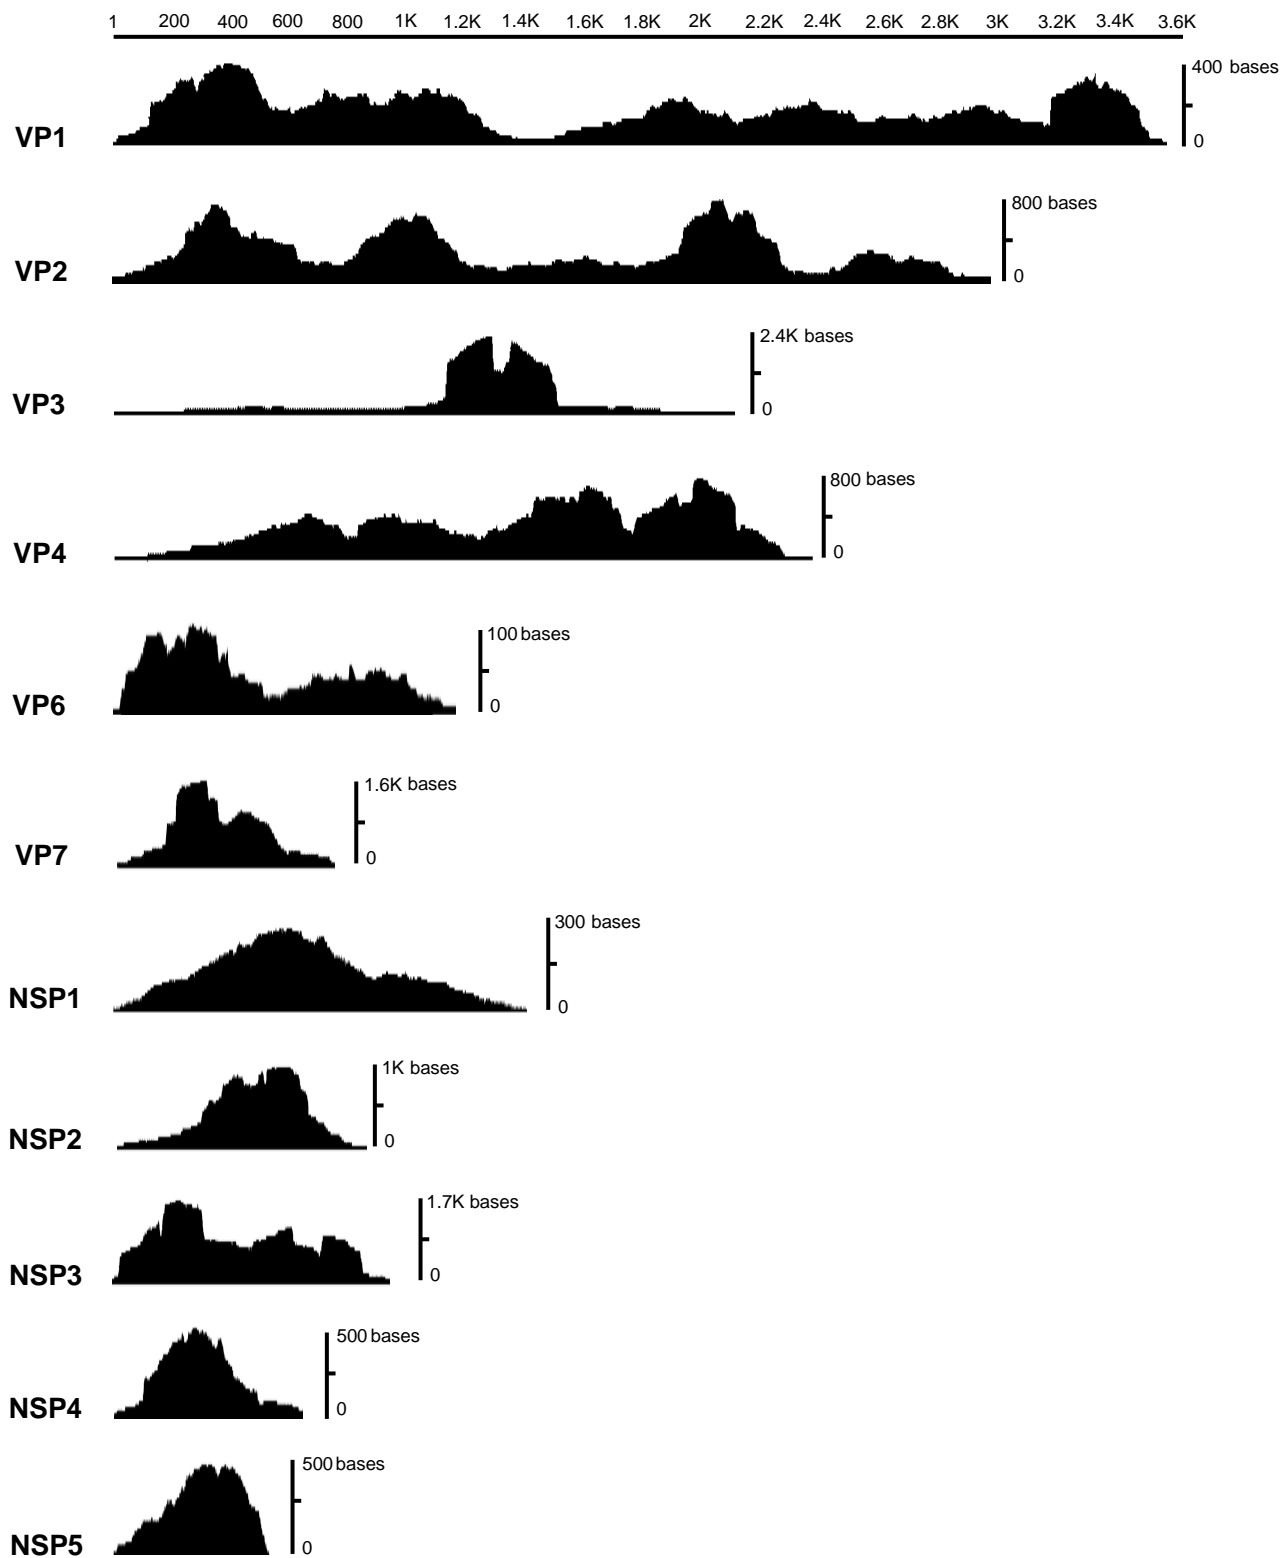

**Supplemental figure 1.** The coverage for each fragment of the rotavirus I strain *Felis catus*.
